# Supplementary material for: Multiple antibiotic susceptibility of polyphosphate kinase mutants (ppk1 and ppk2) from Pseudomonas aeruginosa PAO1 as revealed by global phenotypic analysis
Source: PubMed Central journal article supplement (PMC4424552; doi:10.1186/s40659-015-0012-0), 2015-04-25
Supplement: 40659_2015_12_MOESM1_ESM.pdf [file 40659_2015_12_MOESM1_ESM.pdf]

# A

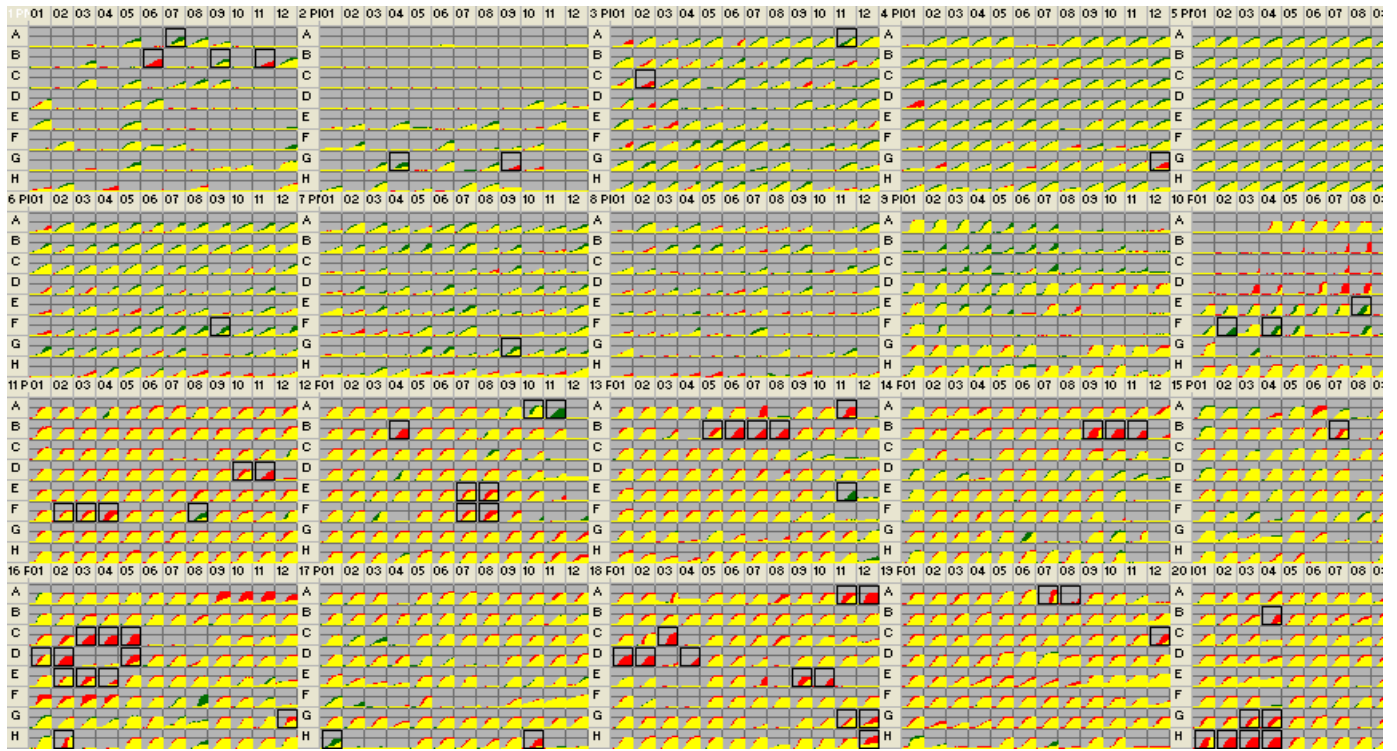

# B

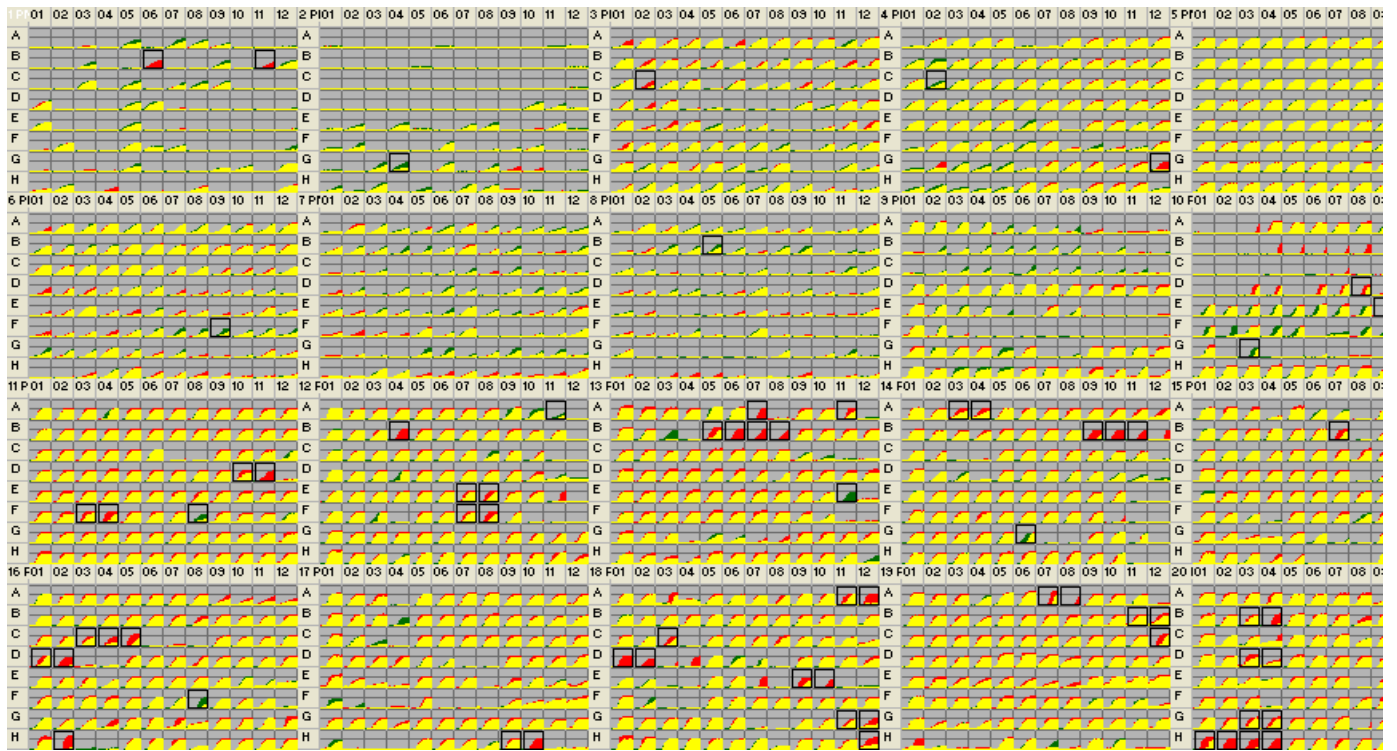

Figure S1

### Carbon sources (PM1, PM2)

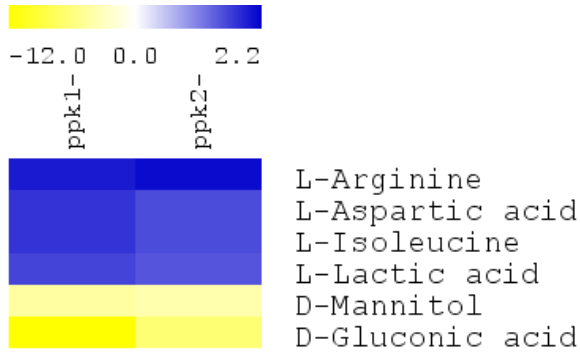

### Nitrogen sources (PM3)

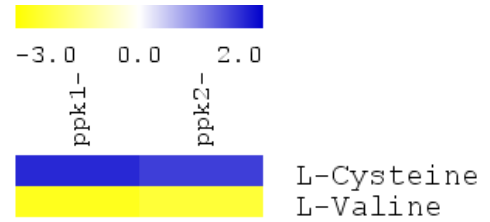

### Phosphorus and Sulfur sources (PM4)

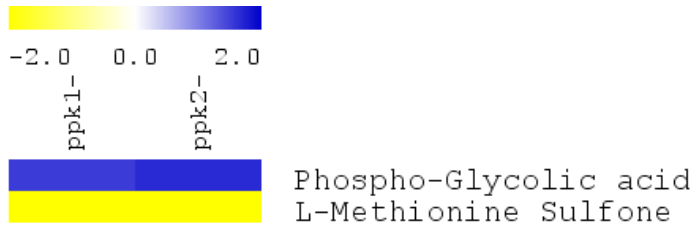

### Peptide nitrogen sources (PM6-PM8)

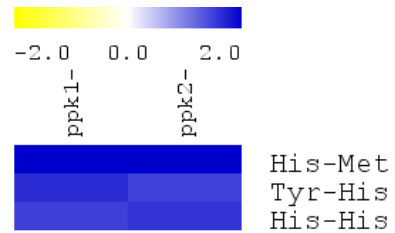

### pH response (PM10)

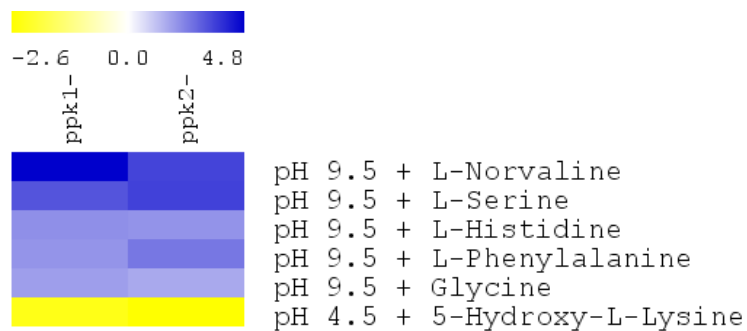

Figure S2

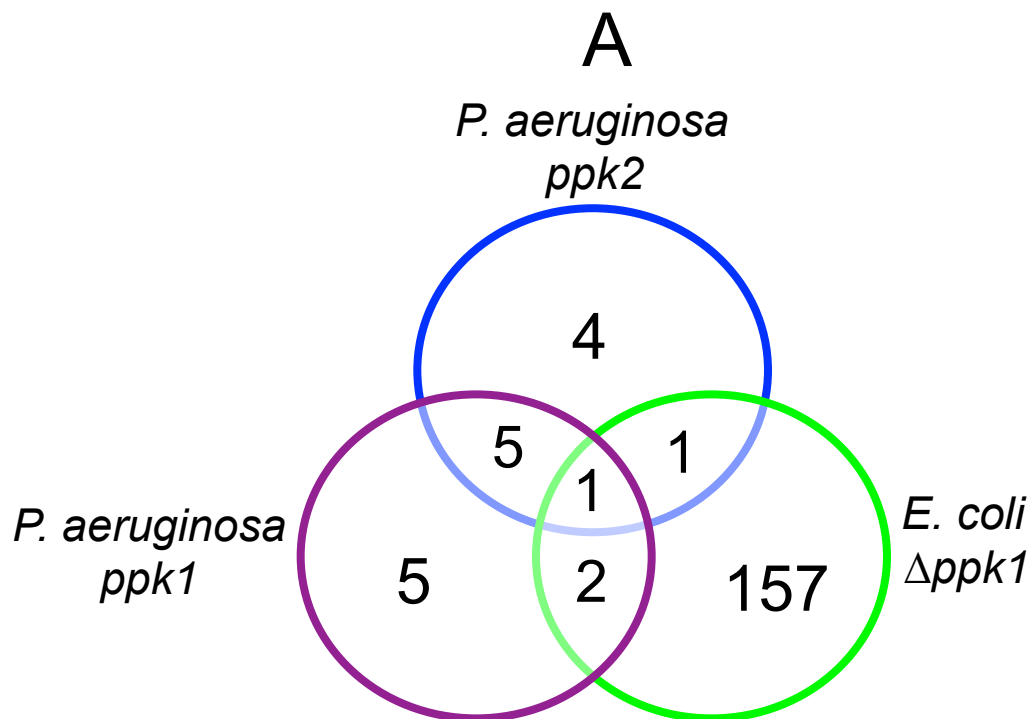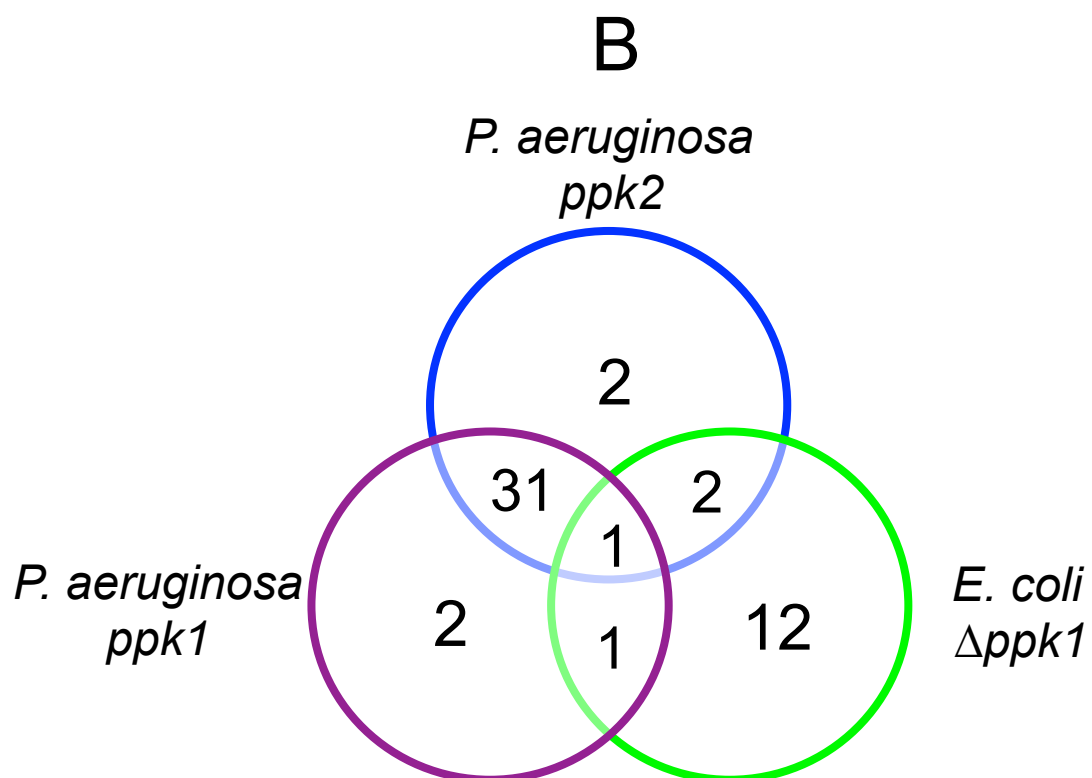

Figure S3
