# Supplementary material for: Multiple antibiotic susceptibility of polyphosphate kinase mutants (ppk1 and ppk2) from Pseudomonas aeruginosa PAO1 as revealed by global phenotypic analysis
Source: PubMed Central journal article supplement (PMC4424552; doi:10.1186/s40659-015-0012-0), 2015-04-25
Supplement: 40659_2015_12_MOESM2_ESM.pdf [file 40659_2015_12_MOESM2_ESM.pdf]

**Supplementary Tables and  
Caption to Supplementary Figures**

**Table S1. Summary of *P. aeruginosa* *ppk1* mutant gain and lost phenotypes.**

| <b>Test</b>                           | <b>Difference</b> | <b>Mode of action</b>                               |
|---------------------------------------|-------------------|-----------------------------------------------------|
| <b>Gain phenotype</b>                 |                   |                                                     |
| L-Aspartic acid                       | 68                | C-Source, amino acid                                |
| L-Lactic acid                         | 64                | C-Source, amino acid                                |
| L-Arginine                            | 50                | C-Source, carboxylic acid                           |
| His-Met                               | 61                | N-Source, peptide                                   |
| Tyr-His                               | 53                | N-Source, peptide                                   |
| L-Cysteine                            | 51                | N-Source, amino acid                                |
| pH 9.5 + Glycine                      | 69                | pH, deaminase                                       |
| pH 9.5 + L-Phenylalanine              | 66                | pH, deaminase                                       |
| pH 9.5 + L-Serine                     | 61                | pH, deaminase                                       |
| Carbenicillin                         | 158               | Wall, lactam                                        |
| Cefsulodin                            | 80                | Wall, cephalosporin                                 |
| Ruthenium red                         | 78                | Respiration, mitochondrial Ca <sup>2+</sup> porter  |
| Erythromycin                          | 67                | Protein synthesis, 50S ribosomal subunit, macrolide |
| <b>Lost phenotype</b>                 |                   |                                                     |
| D-Gluconic acid                       | -112              | C-Source, carboxylic acid                           |
| D-Mannitol                            | -68               | C-Source, carbohydrate                              |
| L-Isoleucine                          | -57               | C-Source, amino acid                                |
| L-Valine                              | -60               | N-Source, amino acid                                |
| L-Methionine Sulfone                  | -69               | S-Source, organic                                   |
| Orphenadrine                          | -78               | Anti-cholinergic                                    |
| Patulin                               | -534              | Microtubulin polymerization inhibitor, antifungal   |
| 2,2'-Dipyridyl                        | -401              | Chelator, lipophilic                                |
| Sodium Arsenite                       | -332              | Toxic anion                                         |
| Sodium Arsenate                       | -305              | Toxic anion, P04 analog                             |
| Dichlofluanid                         | -271              | Fungicide, phenylsulphamide                         |
| Thiamphenicol                         | -269              | Protein synthesis, amphenicol                       |
| Chloramphenicol                       | -209              | Protein synthesis, amphenicol                       |
| Chlorodinitrobenzene                  | -182              | Oxidizes sulfhydryls, depletes glutathione          |
| 8-Hydroxyquinoline                    | -181              | Chelator, lipophilic                                |
| Nafcillin                             | -163              | Wall, lactam                                        |
| Antimony (III) chloride               | -158              | Toxic cation                                        |
| 1,10-Phenanthroline                   | -152              | Chelator, lipophilic                                |
| monohydrate                           | -152              | Fungicide, carbamate                                |
| Captan                                | -148              | Folate antagonist, PABA analog                      |
| Sulfathiazole                         | -141              | Respiration, ionophore, H <sup>+</sup>              |
| Gallic acid                           | -140              | Protein synthesis, 30S ribosomal subunit,           |
| Streptomycin                          | -140              | aminoglycoside                                      |
| Poly-L-lysine                         | -129              | Membrane, detergent, cationic                       |
| Protamine sulfate                     | -127              | Membrane, nonspecific binding                       |
| Sulfadiazine                          | -124              | Folate antagonist, PABA analog                      |
| Oxacillin                             | -113              | Wall, lactam                                        |
| Myricetin                             | -113              | DNA & RNA synthesis, polymerase inhibitor           |
| Nickel chloride                       | -110              | Toxic cation                                        |
| Diamide                               | -106              | Oxidizes sulfhydryls, depletes glutathione          |
| Plumbagin                             | -99               | Oxidizing agent                                     |
| Oxophenylarsine                       | -98               | Tyrosine phosphatase inhibitor                      |
| Trans-Cinnamic acid                   | -67               | Respiration, ionophore, H <sup>+</sup>              |
| EDTA                                  | -66               | Chelator, hydrophilic                               |
| Glycine hydroxamate                   | -63               | tRNA synthetase                                     |
| L-Glutamic acid g-<br>monohydroxamate | -63               | tRNA synthetase                                     |

**Table S2. Summary of *P. aeruginosa* ppk2 mutant gain and lost phenotypes.**

| <b>Test</b>                 | <b>Difference</b> | <b>Mode of action</b>                               |
|-----------------------------|-------------------|-----------------------------------------------------|
| <b>Gain phenotype</b>       |                   |                                                     |
| L-Arginine                  | 75                | C-Source, amino acid                                |
| His-Met                     | 56                | N-Source, peptide                                   |
| His-His                     | 51                | N-Source, peptide                                   |
| Phospho-Glycolic acid       | 57                | P-Source, organic                                   |
| pH 9.5 + L-Histidine        | 84                | pH, deaminase                                       |
| pH 9.5 + L-Norvaline        | 62                | pH, deaminase                                       |
| Ruthenium red               | 110               | Respiration, mitochondrial Ca <sup>2+</sup> porter  |
| Sodium Selenite             | 82                | Toxic anion                                         |
| Erythromycin                | 80                | Protein synthesis, 50S ribosomal subunit, macrolide |
| Carbenicillin               | 71                | Wall, lactam                                        |
| Carbenicillin               | 40                | Wall, lactam                                        |
| <b>Lost phenotype</b>       |                   |                                                     |
| D-Gluconic acid             | -106              | C-Source, carboxylic acid                           |
| D-Mannitol                  | -57               | C-Source, carbohydrate                              |
| L-Valine                    | -58               | N-Source, amino acid                                |
| L-Methionine Sulfone        | -95               | S-Source, organic                                   |
| pH 4.5 + 5-Hydroxy-L-Lysine | -61               | pH, decarboxylase                                   |
| Patulin                     | -495              | Microtubulin polymerization inhibitor, antifungal   |
| 2,2'-Dipyridyl              | -397              | Chelator, lipophilic                                |
| Sodium Arsenate             | -321              | Toxic anion, P04 analog                             |
| Sodium Arsenite             | -242              | Toxic anion                                         |
| 8-Hydroxyquinoline          | -230              | Chelator, lipophilic                                |
| Thiamphenicol               | -193              | Protein synthesis, amphenicol                       |
| Chlorodinitrobenzene        | -187              | Oxidizes sulfhydryls, depletes glutathione          |
| Chloramphenicol             | -173              | Protein synthesis, amphenicol                       |
| Nafcillin                   | -172              | Wall, lactam                                        |
| 1,10-Phenanthroline         | -171              | Chelator, lipophilic                                |
| monohydrate                 | -161              | Tyrosine phosphatase inhibitor                      |
| Oxophenylarsine             | -153              | Toxic cation                                        |
| Antimony (III) chloride     | -146              | Anti-cholinergic                                    |
| Orphenadrine                | -142              | Folate antagonist, PABA analog                      |
| Sulfathiazole               | -140              | DNA intercalator, inhibits RNA                      |
| Acriflavine                 | -136              | tRNA synthetase                                     |
| Glycine hydroxamate         | -130              | Wall, lactam                                        |
| Oxacillin                   | -122              | DNA & RNA synthesis, polymerase inhibitor           |
| Myricetin                   | -119              | Fungicide, phenylsulphamide                         |
| Dichlofluanid               | -118              | Oxidizing agent                                     |
| Plumbagin                   | -116              | DNA intercalator, inhibits RNA                      |
| Proflavine                  | -115              | Respiration, ionophore, H <sup>+</sup>              |
| Gallic acid                 | -113              | Fungicide, carbamate                                |
| Captan                      | -109              | Membrane, nonspecific binding                       |
| Protamine sulfate           | -107              | Folate antagonist, PABA analog                      |
| Sulfadiazine                | -102              | Ion channel inhibitor, K <sup>+</sup>               |
| Dequalinium chloride        | -93               | Respiration, ionophore, H <sup>+</sup>              |
| 2,4-Dinitrophenol           | -90               | Respiration, ionophore, H <sup>+</sup>              |
| trans-Cinnamic acid         | -88               | Chelator, hydrophilic                               |
| EDTA                        | -80               | Toxic cation                                        |
| Nickel chloride             | -63               | Membrane, detergent, cationic                       |
| Poly-L-lysine               |                   |                                                     |

**Table S3. Summary of unique *P. aeruginosa* ppk1 mutant gain and lost phenotypes.**

| <b>Test</b>                       | <b>Difference</b> | <b>Mode of action</b>                                      |
|-----------------------------------|-------------------|------------------------------------------------------------|
| <b>Gain phenotype</b>             |                   |                                                            |
| L-Aspartic acid                   | 68                | C-Source, amino acid                                       |
| L-Lactic acid                     | 64                | C-Source, amino acid                                       |
| Tyr-His                           | 53                | N-Source, peptide                                          |
| L-Cysteine                        | 51                | N-Source, amino acid                                       |
| pH 9.5 + Glycine                  | 69                | pH, deaminase                                              |
| pH 9.5 + L-Phenylalanine          | 66                | pH, deaminase                                              |
| pH 9.5 + L-Serine                 | 61                | pH, deaminase                                              |
| Cefsulodin                        | 80                | Wall, cephalosporin                                        |
| <b>Lost phenotype</b>             |                   |                                                            |
| L-Isoleucine                      | -57               | C-Source, amino acid                                       |
| Streptomycin                      | -140              | Protein synthesis, 30S ribosomal subunit,                  |
| Diamide                           | -110              | aminoglycoside                                             |
| L-Glutamic acid g-monohydroxamate | -63               | Oxidizes sulfhydryls, depletes glutathione tRNA synthetase |

**Table S4. Summary of unique *P. aeruginosa* ppk2 mutant gain and lost phenotypes.**

| <b>Test</b>                 | <b>Difference</b> | <b>Mode of action</b>                  |
|-----------------------------|-------------------|----------------------------------------|
| <b>Gain phenotype</b>       |                   |                                        |
| His-His                     | 51                | N-Source, peptide                      |
| Phospho-Glycolic acid       | 57                | P-Source, organic                      |
| pH 9.5 + L-Histidine        | 84                | pH, deaminase                          |
| pH 9.5 + L-Norvaline        | 62                | pH, deaminase                          |
| Sodium Selenite             | 82                | Toxic anion                            |
| Carbenicillin               | 71                | Wall, lactam                           |
| <b>Lost phenotype</b>       |                   |                                        |
| pH 4.5 + 5-Hydroxy-L-Lysine | -61               | pH, decarboxylase                      |
| Acriflavine                 | -140              | DNA intercalator, inhibits RNA         |
| Proflavine                  | -116              | DNA intercalator, inhibits RNA         |
| Dequalinium chloride        | -102              | Ion channel inhibitor, K <sup>+</sup>  |
| 2,4-Dinitrophenol           | -93               | Respiration, ionophore, H <sup>+</sup> |

**Table S5. Summary of antimicrobial susceptibility testing (M.I.C.Evaluator™ (Oxoid) and Etest® (Biomeriux) for *P. aeruginosa* ppk1 and ppk2 mutant strains.**

| Strain                  | Antibiotics <sup>1</sup> |     |      |      |    |      |    |      |    |     |
|-------------------------|--------------------------|-----|------|------|----|------|----|------|----|-----|
|                         | E                        | IPM | CIP  | VA   | CN | AMC  | SM | CL   | KM | RI  |
| <b>PAO1 WT</b>          | 16                       | 2   | 0.75 | >256 | 1  | >256 | 8  | >256 | 32 | >32 |
| <b>PAO1 <i>ppk1</i></b> | 16                       | 0.5 | 0.12 | >256 | 1  | >256 | 3  | 32   | 24 | 16  |
| <b>PAO1 <i>ppk2</i></b> | 16                       | 0.5 | 0.12 | >256 | 1  | >256 | 3  | 32   | 32 | 3   |

<sup>1</sup> MIC (Minimal inhibitory concentration) parameter for antibiotics Erythromycin (E), Imipenen (IPM), Ciprofloxacin (CIP), Vancomycin (VA), Gentamicin (CN), Amoxicillin (AMC), Streptomycin (SM), Chloramphenicol (CL), Kanamycin (KM) and Rifampicin (RI).

## **Supplementary Figures**

**Figure S1. Consensus graphical profile of metabolic and sensitivity tests of *P. aeruginosa* *ppk1* (A) and *ppk2* (B) mutants.**

Significant changes are enclosed in boxes. Yellow indicates that respiration rate of the wild type and mutant strains were similar. Red indicates faster respiration rate of the wild type (lost phenotype). Green indicates faster respiration rate of the mutant (gain phenotype). The quantitative difference values are shown in Table 1 and Supplementary tables.

**Figure S2. Clustering analysis of metabolic tests (PM1-PM8) and pH response (PM10) from *P. aeruginosa* PAO1 *ppk1* and *ppk2* mutants.**

Gain (blue) and lost (yellow) phenotypes were standardized by dividing the respiration value of the mutants by the value of the wild type strain, for each phenotype. The results are shown separately for the different categories: carbon (C) sources, nitrogen (N) sources, phosphorus (P) and sulfur sources (S), peptide nitrogen (N) sources and pH response.

**Figure S3. Venn diagrams of phenotypic microarrays results from polyP synthesis mutants from *E. coli* K12 and *P. aeruginosa* PAO1.**

The numbers indicate the total phenotypes gained (A) or lost (B) between *P. aeruginosa* *ppk1* and *ppk2* mutants and *E. coli*  $\Delta ppk1$  mutant. Phenotypic microarray results from *E. coli*  $\Delta ppk1$  mutant were performed in a previous work (Unpublished results).
